# Supplementary material
Source: PubMed Central journal article supplement (PMC4050273)
Supplement: ncomms4902-s1.pdf [file ncomms4902-s1.pdf]

## Figures

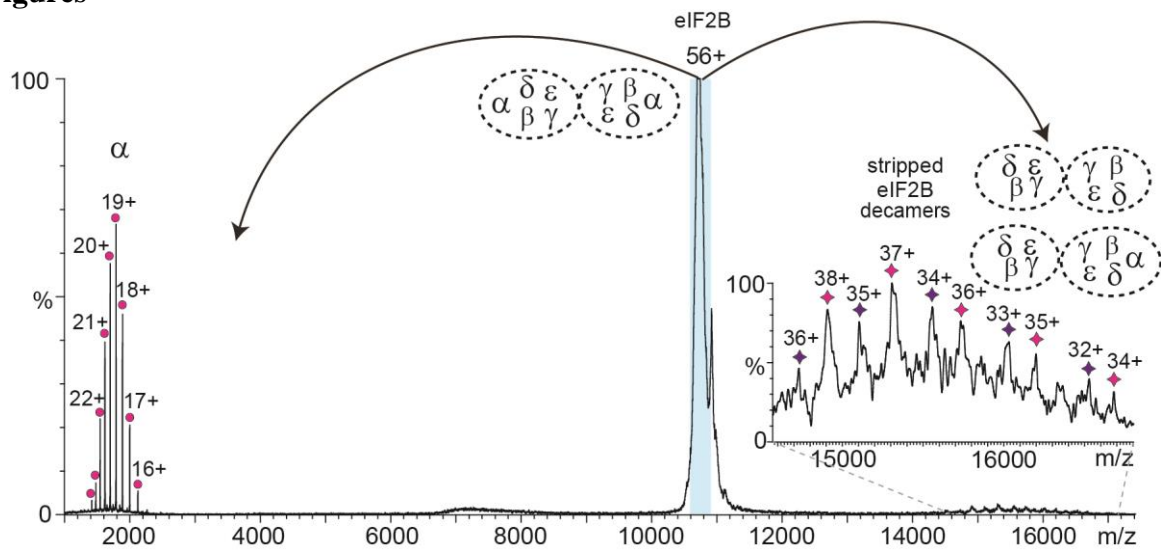

### Supplementary Figure 1. Tandem MS of yeast eIF2B.

Tandem MS of the 56+ charge state (shaded blue) of the eIF2B dimer showing that two  $\alpha$  subunits (● at ~ 2000 m/z) dissociate from the dimer when collision energy is increased resulting in the formation of the corresponding stripped complexes corresponding to the loss of one (◆ at 15000 - 16000 m/z) or two (✦ at 15000 - 16000 m/z)  $\alpha$  subunits and indicating peripheral location of the  $\alpha$  subunit in the complex. The spectrum represents an experiment from at least three biological replicates.

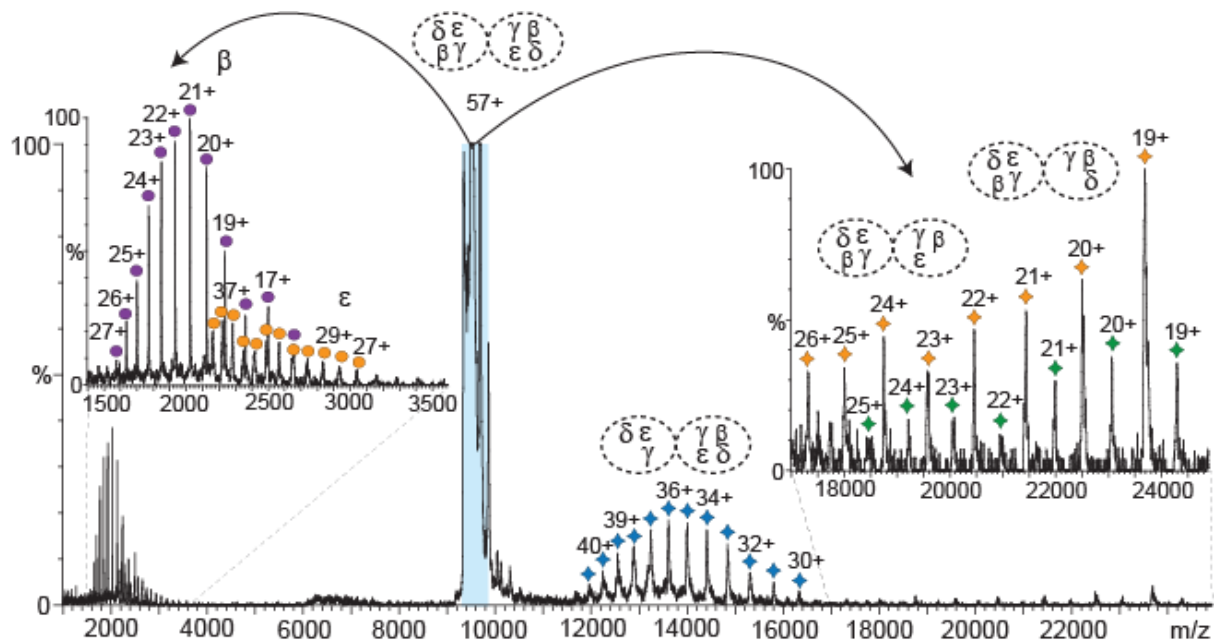

**Supplementary Figure 2. Tandem MS of yeast eIF2B $\beta\delta\gamma\epsilon$  sub-complex.**

Tandem MS of the 57+ charge state (shaded blue) of the eIF2B $\beta\delta\gamma\epsilon$  octamer showing  $\beta$  subunits (● at 1500-2500 m/z) dissociating most readily from the complex under increased collision energy which resulted in the formation of the corresponding  $\beta$ -stripped complexes (◆ at 12000 - 16000 m/z). Much lower intensity species were observed for the  $\epsilon$  subunit (● at 2200-3000 m/z) dissociated from the complex and corresponding stripped complexes (◆ at 18000-24000 m/z). Stripped complexes lacking  $\delta$  subunit were also observed (◆ at 18000-24000 m/z) at very low intensity, however no peaks could be assigned for the dissociated  $\delta$  subunit. The spectrum represents an experiment from two biological replicates.

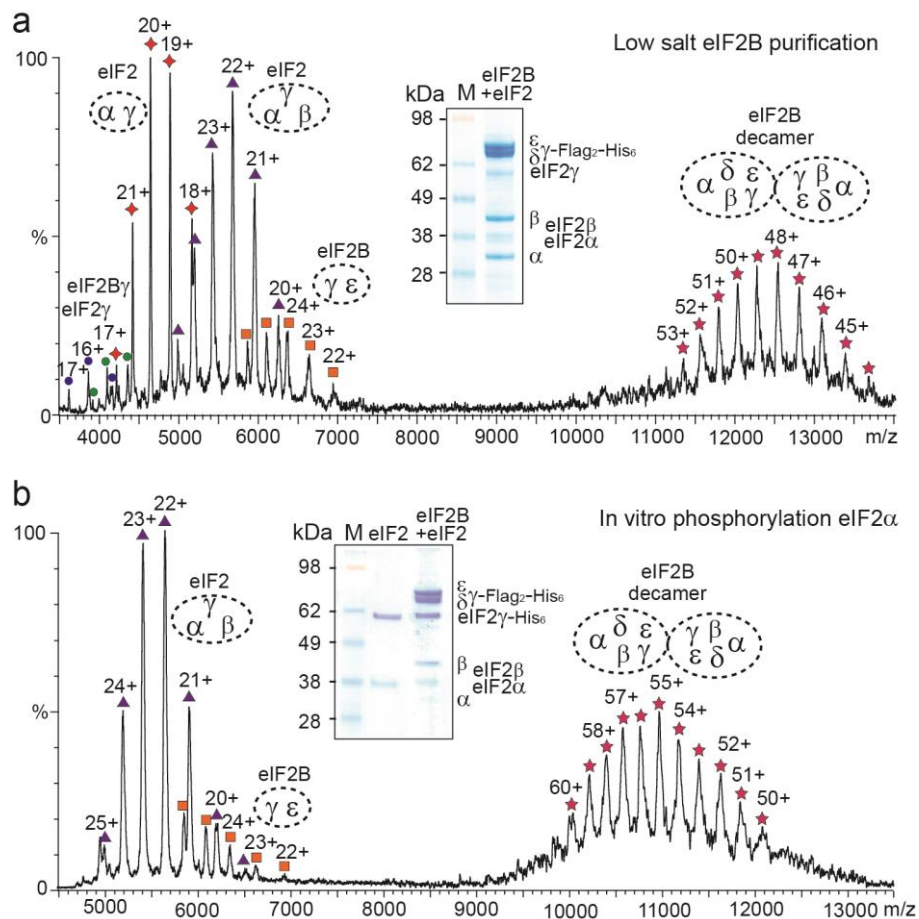

**Supplementary Figure 3. The interaction between eIF2 and eIF2B is transient.**

a - SDS-PAGE of the eIF2-eIF2B complex purified from yeast through the FLAG-tag on the  $\gamma$  subunit of eIF2B at low salt conditions (insert), showing that interaction between eIF2 and eIF2B can be maintained during purification with sub-stoichiometric amounts of eIF2 relative to eIF2B, and native MS of the low salt purified eIF2-eIF2B complex showing separate peaks for the eIF2B (★ at 11000 - 13000 m/z) and eIF2 (▲ at 5000 - 6000 m/z) complexes. Additional species are present corresponding in mass to eIF2  $\alpha/\gamma$  dimer (◆ at 4500 - 5000 m/z), eIF2 $\gamma$  (● at 4000 m/z), eIF2B $\gamma$  (● at 4000 m/z) and eIF2B $\epsilon/\delta$  subcomplex (■ at 6000 - 7000 m/z).

b - SDS-PAGE (insert) and native MS of the eIF2-eIF2B complex assembled on anti-FLAG sepharose attached eIF2B pre-washed in a high salt buffer to disrupt the interactions with endogenous eIF2 and purified in vitro phosphorylated eIF2. While increased amount of eIF2 retained in the complex with eIF2B after phosphorylation at Ser51 (compare to Supplementary Fig. S3a insert), native MS showed separate species for eIF2B (★ at 10000-12000 m/z) and eIF2 (▲ at 5000-6000 m/z) indicating their transient interaction. Low intensity species corresponding to eIF2B $\gamma\epsilon$  subcomplex were present (■ at 6000-7000 m/z).

The spectra shown represent an experiment from at least three biological replicates.

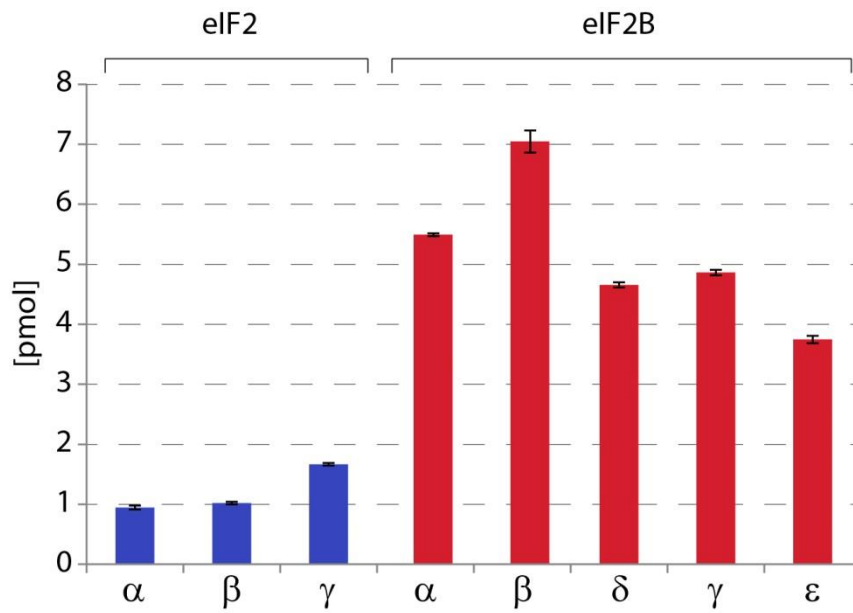

**Supplementary Figure 4. Label-free absolute quantification (iBAQ) of eIF2:eIF2B complex.**

Absolute quantities are given in pmol for eIF2 (blue bars) and eIF2B (red bars) subunits. Error bars show standard deviation determined from three technical replicates are given.

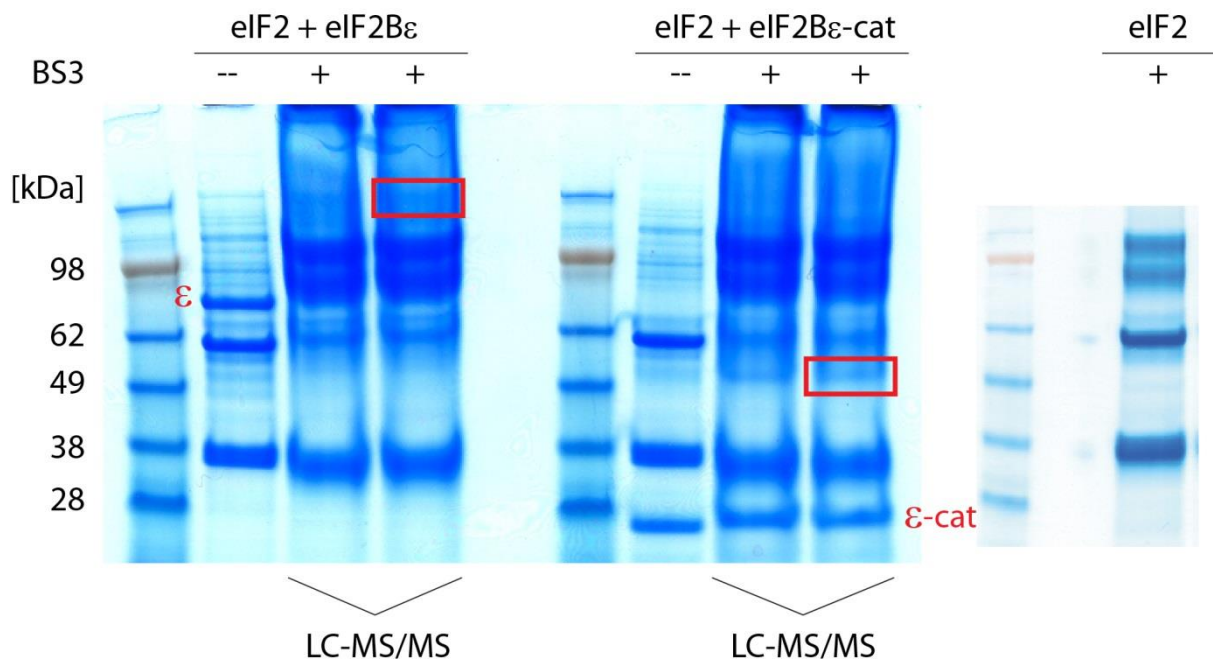

**Supplementary Figure 5. Cross-linking of eIF2 and eIF2B $\epsilon$  and catalytic domain of eIF2B $\epsilon$ .**

eIF2 was incubated with full-length eIF2B $\epsilon$  and the catalytic domain of eIF2B $\epsilon$  in the absence (--) and presence (+) of BS3-cross-linker. Additional protein bands after cross-linking confirm interactions between eIF2 and eIF2B $\epsilon$ . Cross-linking of eIF2 is shown as a control.

**Supplementary Table 1. Masses of proteins and protein complexes identified in eIF2 and eIF2B complexes.**

| <b>Protein/complex</b>                                      | <b>Theoretical mass, Da</b> | <b>Calculated mass of the complex based on measured masses of individual proteins, Da</b> | <b>Measured mass, Da</b> |
|-------------------------------------------------------------|-----------------------------|-------------------------------------------------------------------------------------------|--------------------------|
| eIF2 $\alpha$                                               | 34718                       | N/A                                                                                       | 34799.09 $\pm$ 8.80      |
| eIF2 $\beta$                                                | 31574                       | N/A                                                                                       | 30894.06 $\pm$ 9.22      |
| ● eIF2 $\gamma$                                             | 57866                       | N/A                                                                                       | 57883.77 $\pm$ 25.32     |
| ○ eIF2 $\gamma$ -His <sub>6</sub>                           | 58707                       | N/A                                                                                       | 58919.73 $\pm$ 23.77     |
| ● eIF2 $\gamma$ -His <sub>6</sub> GDP                       | 59150                       | N/A                                                                                       | 59338.20 $\pm$ 22.11     |
| ◆ eIF2 $\alpha/\gamma$                                      | 92584                       | 92663                                                                                     | 92634.34 $\pm$ 15.25     |
| ◇ eIF2 $\alpha/\gamma$ -His <sub>6</sub>                    | 93425                       | 93719                                                                                     | 93800.80 $\pm$ 24.45     |
| ◆ eIF2 $\alpha/\gamma$ -His <sub>6</sub> +GDP               | 93868                       | 94162                                                                                     | 94236.27 $\pm$ 22.15     |
| ▲ eIF2 $\alpha/\beta/\gamma$                                | 124158                      | 124237                                                                                    | 124654.16 $\pm$ 32.24    |
| ▲ eIF2 $\alpha/\beta/\gamma$ -His <sub>6</sub>              | 124999                      | 124613                                                                                    | 124809.35 $\pm$ 21.86    |
| ● eIF2B $\alpha$                                            | 34025                       | N/A                                                                                       | 33938.35 $\pm$ 0.57      |
| ● eIF2B $\beta$                                             | 42570                       | N/A                                                                                       | 42481.09 $\pm$ 5.72      |
| ● eIF2B $\gamma$ -Fl <sub>2</sub> -His <sub>6</sub>         | 69376                       | N/A                                                                                       | 69399.73 $\pm$ 11.37     |
| ● eIF2B $\epsilon$                                          | 81161                       | N/A                                                                                       | 82096.53 $\pm$ 25.96     |
| ● eIF2B $\epsilon$ -Fl                                      | 81161                       | N/A                                                                                       | 85889 $\pm$ 8.46         |
| ■ eIF2B $\gamma/\epsilon$                                   | 150537                      | 151497                                                                                    | 152537.98 $\pm$ 51.87    |
| ■ eIF2B $\gamma$ -Fl/ $\epsilon$ (core)                     | 150537                      | 151845                                                                                    | 152544.35 $\pm$ 40.38    |
| ◆ eIF2B( $\gamma/\epsilon$ ) x 2                            | 301074                      | 302994                                                                                    | 305122.28 $\pm$ 48.22    |
| ◆ eIF2B( $\gamma$ -Fl/ $\epsilon$ ) x 2 (core)              | 301074                      | 303532                                                                                    | 306362 $\pm$ n/a         |
| ◆ eIF2B( $\beta\delta\gamma\epsilon$ )x2                    | 527918                      | 529660                                                                                    | 532230.50 $\pm$ 35.72    |
| ◆ eIF2B( $\beta\delta\gamma\epsilon$ )x2 - $\beta$          | 485348                      | 487179                                                                                    | 489650.22 $\pm$ 55.90    |
| ◆ eIF2B( $\beta\delta\gamma\epsilon$ )x2 - $\epsilon$       | 446757                      | 447563                                                                                    | 449863.25 $\pm$ 50.34    |
| ◆ eIF2B( $\beta\delta\gamma\epsilon$ )x2 - $\delta$         | 457066                      | 458808                                                                                    | 461244.63 $\pm$ 139.52   |
| ◆ eIF2B( $\alpha\beta\delta\gamma\epsilon$ )x2              | 595968                      | 597536                                                                                    | 600893.81 $\pm$ 49.52    |
| ◆ eIF2B( $\alpha\beta\delta\gamma\epsilon$ )x2 - $\alpha$   | 561943                      | 563598                                                                                    | 566299.19 $\pm$ 59.85    |
| ◆ eIF2B( $\alpha\beta\delta\gamma\epsilon$ )x2 - 2 $\alpha$ | 527918                      | 529660                                                                                    | 528510.38 $\pm$ 40.13    |

**Supplementary Table 2. Intra-cross-links in eIF2B subunits.**

| Residue 1                                  | Residue 2          | Complex                                                                      | Distance<br>$C_{\alpha}-C_{\alpha}$<br>(Å) | Residue 1                                | Residue 2        | Complex                             | Distance<br>$C_{\alpha}-C_{\alpha}$<br>(Å) |
|--------------------------------------------|--------------------|------------------------------------------------------------------------------|--------------------------------------------|------------------------------------------|------------------|-------------------------------------|--------------------------------------------|
| <b><math>\alpha</math> subunit intra</b>   |                    |                                                                              |                                            | <b><math>\delta</math> subunit intra</b> |                  |                                     |                                            |
| $\alpha$ Lys107                            | $\alpha$ Lys145    | 2+2B                                                                         | 14.77                                      | $\delta$ Lys 7                           | $\delta$ Lys 365 | 2+2B                                | -                                          |
| $\alpha$ Lys107                            | $\alpha$ Lys111    | 2+2B                                                                         | 6.34                                       | $\delta$ Lys 33                          | $\delta$ Lys 40  | 2B $\beta\delta\gamma\epsilon$      | -                                          |
| <b><math>\beta</math> subunit intra</b>    |                    |                                                                              |                                            | $\delta$ Lys 33                          | $\delta$ Lys 43  | 2+2B                                | -                                          |
| $\beta$ Lys136                             | $\beta$ Lys147     | 2B $\beta\delta\gamma\epsilon$                                               | 20.15                                      | $\delta$ Lys 40                          | $\delta$ Lys 47  | 2B $\beta\delta\gamma\epsilon$      | 10.20                                      |
| $\beta$ Lys145                             | $\beta$ Lys147     | 2B $\beta\delta\gamma\epsilon$                                               | 7.27                                       | $\delta$ Lys 40                          | $\delta$ Lys 96  | 2+2B                                | 32.44                                      |
| $\beta$ Lys224                             | $\beta$ Lys231     | 2B $\beta\delta\gamma\epsilon$                                               | 10.18                                      | $\delta$ Lys 43                          | $\delta$ Lys 50  | 2+2B                                | 14.34                                      |
| $\beta$ Lys378                             | $\beta$ Lys380     | 2B $\beta\delta\gamma\epsilon$                                               | -                                          | $\delta$ Lys 47                          | $\delta$ Lys 133 | 2+2B                                | -                                          |
| <b><math>\gamma</math> subunit intra</b>   |                    |                                                                              |                                            | $\delta$ Lys 72                          | $\delta$ Lys 575 | 2B $\beta\delta\gamma\epsilon$      | -                                          |
| $\gamma$ Lys 147                           | $\gamma$ Lys 157   | 2B $\beta\delta\gamma\epsilon$                                               | 12.33                                      | $\delta$ Lys 73                          | $\delta$ Lys 76  | 2+2B/2B $\beta\delta\gamma\epsilon$ | 2.39                                       |
| $\gamma$ Lys 211                           | $\gamma$ Lys 212   | 2B $\beta\delta\gamma\epsilon$ / 2B $\gamma\epsilon$                         | 2.53                                       | $\delta$ Lys 76                          | $\delta$ Lys 85  | 2B $\beta\delta\gamma\epsilon$      | 14.08                                      |
| $\gamma$ Lys 211                           | $\gamma$ Lys 216   | 2B $\beta\delta\gamma\epsilon$ / 2B $\gamma\epsilon$                         | 5.66                                       | $\delta$ Lys 85                          | $\delta$ Lys 89  | 2B $\beta\delta\gamma\epsilon$      | 5.99                                       |
| $\gamma$ Lys 211                           | $\gamma$ Lys 410   | 2B $\beta\delta\gamma\epsilon$ / 2B $\gamma\epsilon$                         | -                                          | $\delta$ Lys 89                          | $\delta$ Lys 133 | 2B $\beta\delta\gamma\epsilon$      | -                                          |
| $\gamma$ Lys 249                           | $\gamma$ Lys 251   | 2B $\beta\delta\gamma\epsilon$ / 2B $\gamma\epsilon$                         | -                                          | $\delta$ Lys 95                          | $\delta$ Lys 133 | 2+2B/2B $\beta\delta\gamma\epsilon$ | -                                          |
| $\gamma$ Lys 412                           | $\gamma$ Lys 419   | 2B $\beta\delta\gamma\epsilon$                                               | 19.23                                      | $\delta$ Lys 97                          | $\delta$ Lys 104 | 2B $\beta\delta\gamma\epsilon$      | 15.30                                      |
| $\gamma$ Lys 345                           | $\gamma$ Lys 376   | 2B $\gamma\epsilon$                                                          | -                                          | $\delta$ Lys 97                          | $\delta$ Lys 133 | 2+2B                                | -                                          |
| $\gamma$ Lys 345                           | $\gamma$ Lys 346   | 2B $\gamma\epsilon$                                                          | -                                          | $\delta$ Lys 97                          | $\delta$ Lys 556 | 2+2B                                | -                                          |
| $\gamma$ Lys 116                           | $\gamma$ Lys 140   | 2+2B/2B $\gamma\epsilon$                                                     | -                                          | $\delta$ Lys 133                         | $\delta$ Lys 559 | 2+2B                                | -                                          |
| $\gamma$ Lys 221                           | $\gamma$ Lys 410   | 2+2B                                                                         | -                                          | $\delta$ Lys 133                         | $\delta$ Lys 562 | 2+2B                                | -                                          |
| $\gamma$ Lys 249                           | $\gamma$ Lys 362   | 2+2B/2B $\beta\delta\gamma\epsilon$<br>/ 2B $\gamma\epsilon$                 | -                                          | $\delta$ Lys 133                         | $\delta$ Lys 570 | 2B $\beta\delta\gamma\epsilon$      | -                                          |
| $\gamma$ Lys 251                           | $\gamma$ Lys 362   | 2+2B                                                                         | -                                          | $\delta$ Lys 332                         | $\delta$ Lys 572 | 2B $\beta\delta\gamma\epsilon$      | -                                          |
| $\gamma$ Lys 410                           | $\gamma$ Lys 412   | 2+2B                                                                         | -                                          | $\delta$ Lys 547                         | $\delta$ Lys 559 | 2+2B/2B $\beta\delta\gamma\epsilon$ | 20.93                                      |
| $\gamma$ Lys 410                           | $\gamma$ Lys 494   | 2+2B                                                                         | -                                          | $\delta$ Lys 547                         | $\delta$ Lys 562 | 2+2B/2B $\beta\delta\gamma\epsilon$ | 20.75                                      |
| <b><math>\epsilon</math> subunit intra</b> |                    |                                                                              |                                            | $\delta$ Lys 556                         | $\delta$ Lys 559 | 2+2B/2B $\beta\delta\gamma\epsilon$ | 5.14                                       |
| $\epsilon$ Lys 4                           | $\epsilon$ Lys 9   | 2+2B/2B $\beta\delta\gamma\epsilon$                                          | -                                          | $\delta$ Lys 556                         | $\delta$ Lys 562 | 2+2B/2B $\beta\delta\gamma\epsilon$ | 7.54                                       |
| $\epsilon$ Lys 5                           | $\epsilon$ Lys 9   | 2+2B                                                                         | -                                          | $\delta$ Lys 556                         | $\delta$ Lys 579 | 2+2B                                | 18.62                                      |
| $\epsilon$ Lys 8                           | $\epsilon$ Lys 9   | 2+2B/2B $\beta\delta\gamma\epsilon$                                          | -                                          | $\delta$ Lys 559                         | $\delta$ Lys 570 | 2B $\beta\delta\gamma\epsilon$      | 28.52                                      |
| $\epsilon$ Lys 4                           | $\epsilon$ Lys 520 | 2+2B/2B $\gamma\epsilon$                                                     | -                                          | $\delta$ Lys 559                         | $\delta$ Lys 579 | 2+2B                                | 20.23                                      |
| $\epsilon$ Lys 9                           | $\epsilon$ Lys 17  | 2B $\beta\delta\gamma\epsilon$ / 2B $\gamma\epsilon$                         | -                                          | $\delta$ Lys 562                         | $\delta$ Lys 580 | 2+2B                                | 22.56                                      |
| $\epsilon$ Lys 176                         | $\epsilon$ Lys 189 | 2B $\gamma\epsilon$                                                          | 25.13                                      | $\delta$ Lys 570                         | $\delta$ Lys 575 | 2B $\beta\delta\gamma\epsilon$      | 12.15                                      |
| $\epsilon$ Lys 327                         | $\epsilon$ Lys 329 | 2B $\gamma\epsilon$                                                          | 6.71                                       | $\delta$ Lys 570                         | $\delta$ Lys 579 | 2B $\beta\delta\gamma\epsilon$      | 19.94                                      |
| $\epsilon$ Lys 338                         | $\epsilon$ Lys 356 | 2+2B/2B $\beta\delta\gamma\epsilon$<br>/ 2B $\gamma\epsilon$                 | 16.56                                      | $\delta$ Lys 570                         | $\delta$ Lys 580 | 2B $\beta\delta\gamma\epsilon$      | 3.85                                       |
| $\epsilon$ Lys 431                         | $\epsilon$ Lys 438 | 2B $\beta\delta\gamma\epsilon$ / 2B $\gamma\epsilon$<br>/ 2B $\epsilon$      | -                                          | $\delta$ Lys 572                         | $\delta$ Lys 575 | 2B $\beta\delta\gamma\epsilon$      | 10.20                                      |
| $\epsilon$ Lys 690                         | $\epsilon$ Lys 691 | 2B $\beta\delta\gamma\epsilon$ / 2B $\gamma\epsilon$<br>/ 2B $\epsilon$ -cat | 3.82                                       | $\delta$ Lys 575                         | $\delta$ Lys 580 | 2+2B/2B $\beta\delta\gamma\epsilon$ | 16.88                                      |
|                                            |                    |                                                                              |                                            | $\delta$ Lys 579                         | $\delta$ Lys 587 | 2B $\beta\delta\gamma\epsilon$      | 7.96                                       |

**Supplementary Table 3. Inter-cross-links between eIF2B subunits.**

| <b>Residue 1</b>                                             | <b>Residue 2</b>   | <b>Complex</b>                 |
|--------------------------------------------------------------|--------------------|--------------------------------|
| <b>2B<math>\alpha</math> - 2B<math>\gamma</math> inter</b>   |                    |                                |
| $\alpha$ Lys 107                                             | $\gamma$ Lys 412   | 2+2B                           |
| <b>2B<math>\beta</math> - 2B<math>\delta</math> inter</b>    |                    |                                |
| $\beta$ Lys 136                                              | $\delta$ Lys 648   | 2B $\beta\delta\gamma\epsilon$ |
| $\beta$ Lys 380                                              | $\delta$ Lys 95    | 2+2B                           |
| $\beta$ Lys 380                                              | $\delta$ Lys 570   | 2B $\beta\delta\gamma\epsilon$ |
| <b>2B<math>\beta</math> - 2B<math>\gamma</math> inter</b>    |                    |                                |
| $\beta$ Lys 329                                              | $\gamma$ Lys 494   | 2B $\beta\delta\gamma\epsilon$ |
| <b>2B<math>\beta</math> - 2B<math>\epsilon</math> inter</b>  |                    |                                |
| $\beta$ Lys 380                                              | $\epsilon$ Lys 9   | 2+2B                           |
| <b>2B<math>\gamma</math> - 2B<math>\delta</math> inter</b>   |                    |                                |
| $\gamma$ Lys 249                                             | $\delta$ Lys 76    | 2+2B                           |
| $\gamma$ Lys 410                                             | $\delta$ Lys 422   | 2+2B                           |
| $\gamma$ Lys 410                                             | $\delta$ Lys 559   | 2+2B                           |
| $\gamma$ Lys 410                                             | $\delta$ Lys 562   | 2+2B                           |
| $\gamma$ Lys 410                                             | $\delta$ Lys 570   | 2B $\beta\delta\gamma\epsilon$ |
| $\gamma$ Lys 410                                             | $\delta$ Lys 575   | 2+2B                           |
| $\gamma$ Lys 410                                             | $\delta$ Lys 579   | 2+2B                           |
| $\gamma$ Lys 410                                             | $\delta$ Lys 580   | 2+2B                           |
| $\gamma$ Lys 412                                             | $\delta$ Lys 133   | 2B $\beta\delta\gamma\epsilon$ |
| <b>2B<math>\gamma</math> - 2B<math>\epsilon</math> inter</b> |                    |                                |
| $\gamma$ Lys 376                                             | $\epsilon$ Lys 176 | 2+2B                           |
| $\gamma$ Lys 249                                             | $\epsilon$ Lys 176 | 2B $\gamma\epsilon$ (Tri)      |
| $\gamma$ Lys 249                                             | $\epsilon$ Lys 517 | 2B $\beta\delta\gamma\epsilon$ |
| $\gamma$ Lys 249                                             | $\epsilon$ Lys 519 | 2B $\gamma\epsilon$ (Tri)      |
| <b>2B<math>\delta</math> - 2B<math>\epsilon</math> inter</b> |                    |                                |
| $\delta$ Lys 556                                             | $\epsilon$ Lys 4   | 2+2B                           |
| $\delta$ Lys 564                                             | $\epsilon$ Lys 4   | 2+2B                           |
| $\delta$ Lys 421                                             | $\epsilon$ Lys 356 | 2+2B                           |



**Supplementary Table 4. eIF2 intra- and inter- cross-links.**

| Residue1                                  | Residue 2        | Distance $C_{\alpha} - C_{\alpha}$ (Å) | Complex                                    | Residue 1        | Residue 2        | Distance $C_{\alpha} - C_{\alpha}$ (Å) | Complex                               |
|-------------------------------------------|------------------|----------------------------------------|--------------------------------------------|------------------|------------------|----------------------------------------|---------------------------------------|
| <b>2<math>\alpha</math> subunit intra</b> |                  |                                        |                                            |                  |                  |                                        |                                       |
| $\alpha$ Lys 61                           | $\alpha$ Lys 87  | 14.49                                  | 2-2B/2-2B $\epsilon$ /2-2B $\epsilon$ -cat | $\alpha$ Lys 78  | $\alpha$ Lys 80  | 6.20                                   | 2-2B $\epsilon$ /2-2B $\epsilon$ -cat |
| $\alpha$ Lys 118                          | $\alpha$ Lys 175 | 14.58                                  | 2-2B                                       | $\alpha$ Lys 106 | $\alpha$ Lys 183 | 23.98                                  | 2-2B $\epsilon$                       |
| $\alpha$ Lys 67                           | $\alpha$ Lys 61  | 10.57                                  | 2-2B $\epsilon$ /2-2B $\epsilon$ -cat      | $\alpha$ Lys 118 | $\alpha$ Lys 175 | 14.58                                  | 2-2B $\epsilon$                       |
| $\alpha$ Lys 67                           | $\alpha$ Lys 78  | 27.04                                  | 2-2B $\epsilon$ /2-2B $\epsilon$ -cat      | $\alpha$ Lys 104 | $\alpha$ Lys 106 | 5.47                                   | 2-2B $\epsilon$ /2-2B $\epsilon$ -cat |
| $\alpha$ Lys 67                           | $\alpha$ Lys 87  | 13.30                                  | 2-2B $\epsilon$ /2-2B $\epsilon$ -cat      | $\alpha$ Lys 170 | $\alpha$ Lys 175 | 8.38                                   | 2-2B $\epsilon$                       |
| $\alpha$ Lys 67                           | $\alpha$ Lys 106 | 15.98                                  | 2-2B $\epsilon$ /2-2B $\epsilon$ -cat      | $\alpha$ Lys 221 | $\alpha$ Lys 175 | 26.21                                  | 2-2B $\epsilon$                       |
| $\alpha$ Lys 67                           | $\alpha$ Lys 183 | 34.89                                  | 2-2B $\epsilon$                            | $\alpha$ Lys 221 | $\alpha$ Lys 183 | 14.62                                  | 2-2B $\epsilon$ -cat                  |
| $\alpha$ Lys 78                           | $\alpha$ Lys 87  | 22.08                                  | 2-2B $\epsilon$                            | $\alpha$ Lys 239 | $\alpha$ Lys 175 | 19.92                                  | 2-2B $\epsilon$ -cat                  |
| <b>2<math>\beta</math> subunit intra</b>  |                  |                                        |                                            |                  |                  |                                        |                                       |
| $\beta$ Lys 82                            | $\beta$ Lys 83   | -                                      | 2-2B $\epsilon$                            | $\beta$ Lys 170  | $\beta$ Lys 216  | 11.24                                  | 2-2B $\epsilon$                       |
| $\beta$ Lys 87                            | $\beta$ Lys 89   | -                                      | 2-2B $\epsilon$ /2-2B $\epsilon$ -cat      | $\beta$ Lys 171  | $\beta$ Lys 214  | 6.75                                   | 2-2B $\epsilon$ /2-2B $\epsilon$ -cat |
| $\beta$ Lys 89                            | $\beta$ Lys 98   | -                                      | 2-2B $\epsilon$                            | $\beta$ Lys 214  | $\beta$ Lys 281  | -                                      | 2-2B $\epsilon$ /2-2B $\epsilon$ -cat |
| $\beta$ Lys 157                           | $\beta$ Lys 240  | 10.55                                  | 2-2B                                       | $\beta$ Lys 214  | $\beta$ Lys 216  | 5.27                                   | 2-2B $\epsilon$ /2-2B $\epsilon$ -cat |
| $\beta$ Lys 157                           | $\beta$ Lys 281  | -                                      | 2-2B $\epsilon$                            | $\beta$ Lys 216  | $\beta$ Lys 281  | -                                      | 2-2B $\epsilon$                       |
| $\beta$ Lys 214                           | $\beta$ Lys 281  | -                                      | 2-2B                                       | $\beta$ Lys 216  | $\beta$ Lys 220  | 12.73                                  | 2-2B $\epsilon$                       |
| $\beta$ Lys 170                           | $\beta$ Lys 171  | 3.79                                   | 2-2B $\epsilon$ /2-2B $\epsilon$ -cat      | $\beta$ Lys 272  | $\beta$ Lys 281  | -                                      | 2-2B $\epsilon$                       |
| $\beta$ Lys 170                           | $\beta$ Lys 214  | 8.40                                   | 2-2B $\epsilon$ /2-2B $\epsilon$ -cat      |                  |                  |                                        |                                       |
| <b>2<math>\gamma</math> subunit intra</b> |                  |                                        |                                            |                  |                  |                                        |                                       |
| $\gamma$ Lys 498                          | $\gamma$ Lys 518 | 9.99                                   | 2-2B/2-2B $\epsilon$                       | $\gamma$ Lys 455 | $\gamma$ Lys 479 | 11.68                                  | 2-2B $\epsilon$                       |
| $\gamma$ Lys 165                          | $\gamma$ Lys 113 | 16.39                                  | 2-2B                                       | $\gamma$ Lys 479 | $\gamma$ Lys 518 | 12.41                                  | 2-2B $\epsilon$ /2-2B $\epsilon$ -cat |
| $\gamma$ Lys 264                          | $\gamma$ Lys 268 | 6.15                                   | 2-2B/2-2B $\epsilon$                       | $\gamma$ Lys 479 | $\gamma$ Lys 519 | 14.35                                  | 2-2B $\epsilon$ /2-2B $\epsilon$ -cat |

|                                                       |                                |       |                                       |                  |                  |      |                                       |
|-------------------------------------------------------|--------------------------------|-------|---------------------------------------|------------------|------------------|------|---------------------------------------|
| $\gamma$ Lys 129                                      | $\gamma$ Lys 507               | 28.40 | 2-2B $\epsilon$ /2-2B $\epsilon$ -cat | $\gamma$ Lys 165 | $\gamma$ Lys 168 | 6.33 | 2-2B $\epsilon$ /2-2B $\epsilon$ -cat |
| $\gamma$ Lys 129                                      | $\gamma$ Lys 139               | 15.19 | 2-2B $\epsilon$ /2-2B $\epsilon$ -cat | $\gamma$ Lys 265 | $\gamma$ Lys 269 | 6.15 | 2-2B $\epsilon$ -cat                  |
| $\gamma$ Lys 129                                      | $\gamma$ Lys 325               | 17.50 | 2-2B $\epsilon$                       | $\gamma$ Lys 325 | $\gamma$ Lys 334 | 9.98 | 2-2B $\epsilon$                       |
| $\gamma$ Lys 139                                      | $\gamma$ Lys 507               | 18.67 | 2-2B $\epsilon$                       | $\gamma$ Lys 362 | $\gamma$ Lys 365 | 9.59 | 2-2B $\epsilon$ /2-2B $\epsilon$ -cat |
| $\gamma$ Lys 444                                      | $\gamma$ Lys 452               | 11.37 | 2-2B $\epsilon$                       | $\gamma$ Lys 444 | $\gamma$ Lys 449 | 4.83 | 2-2B $\epsilon$ /2-2B $\epsilon$ -cat |
| $\gamma$ Lys 455                                      | $\gamma$ Lys 452               | 9.30  | 2-2B $\epsilon$                       | $\gamma$ Lys 449 | $\gamma$ Lys 452 | 8.08 | 2-2B $\epsilon$ /2-2B $\epsilon$ -cat |
| <b>2<math>\alpha</math>-<math>\beta</math> inter</b>  |                                |       |                                       |                  |                  |      |                                       |
| $\alpha$ Lys 61                                       | $\beta$ Lys 170                |       | 2-2B $\epsilon$                       | $\alpha$ Lys 61  | $\beta$ Lys 272  |      | 2-2B $\epsilon$                       |
| $\alpha$ Lys 61                                       | $\beta$ Lys 214                |       | 2-2B $\epsilon$                       | $\alpha$ Lys 61  | $\beta$ Lys 281  |      | 2-2B $\epsilon$ /2-2B $\epsilon$ -cat |
| <b>2<math>\alpha</math>-<math>\gamma</math> inter</b> |                                |       |                                       |                  |                  |      |                                       |
| $\alpha$ Lys 61                                       | $\gamma$ Lys 325               |       | 2-2B $\epsilon$ /2-2B $\epsilon$ -cat | $\alpha$ Lys 80  | $\gamma$ Lys 268 |      | 2-2B $\epsilon$ -cat                  |
| $\alpha$ Lys 61                                       | $\gamma$ Lys 129               |       | 2-2B $\epsilon$ -cat                  | $\alpha$ Lys 183 | $\gamma$ Lys 452 |      | 2-2B $\epsilon$                       |
| $\alpha$ Lys 61                                       | $\gamma$ Lys 165               |       | 2-2B $\epsilon$ -cat                  |                  |                  |      |                                       |
| <b>2<math>\gamma</math>-<math>\beta</math> inter</b>  |                                |       |                                       |                  |                  |      |                                       |
| $\gamma$ Lys 184                                      | $\beta$ Lys 19/86 <sup>1</sup> |       | 2-2B                                  | $\gamma$ Lys 268 | $\beta$ Lys 102  |      | 2-2B $\epsilon$                       |
| $\gamma$ Lys 449                                      | $\beta$ Lys 260                |       | 2-2B                                  | $\gamma$ Lys 129 | $\beta$ Lys 157  |      | 2-2B $\epsilon$                       |
| $\gamma$ Lys 401                                      | $\beta$ Lys 89                 |       | 2-2B                                  | $\gamma$ Lys 165 | $\beta$ Lys 54   |      | 2-2B $\epsilon$ -cat                  |

<sup>1</sup> Not unique, either residue might be cross-linked 2 $\beta$  Lys 19 or 2 $\beta$  Lys 86

**Supplementary Table 5. Cross-links between eIF2 and eIF2B.**

| Residue1<br>eIF2                 | Residue 2<br>eIF2B   | Complex         |
|----------------------------------|----------------------|-----------------|
| 2 $\alpha$ Lys 67                | B $\epsilon$ Lys 691 | 2-2B            |
| 2 $\alpha$ Lys 175               | B $\delta$ Lys 365   | 2-2B            |
| 2 $\beta$ Lys 170                | B $\alpha$ Lys 145   | 2-2B            |
| 2 $\beta$ Lys 240                | B $\gamma$ Lys 249   | 2-2B            |
| 2 $\beta$ Lys 183                | B $\gamma$ Lys 249   | 2-2B            |
| 2 $\beta$ Lys 247                | B $\epsilon$ Lys 17  | 2-2B $\epsilon$ |
| 2 $\beta$ Lys 260                | B $\epsilon$ Lys 154 | 2-2B $\epsilon$ |
| 2 $\beta$ Lys 19/86 <sup>1</sup> | B $\delta$ Lys 439   | 2-2B            |
| 2 $\beta$ Lys 247                | B $\delta$ Lys 422   | 2-2B            |
| 2 $\gamma$ Lys 66                | B $\gamma$ Lys 249   | 2-2B            |
| 2 $\gamma$ Lys 113               | B $\gamma$ Lys 249   | 2-2B            |
| 2 $\gamma$ Lys 53                | B $\delta$ Lys 32    | 2-2B            |
| 2 $\gamma$ Lys 518               | B $\delta$ Lys 89    | 2-2B            |

**Supplementary Table 6. Homology models of eIF2 and eIF2B subunits.**

| Segment submitted         | Modelling server | Modeled segment | Model score | PDB template code | Sequence identity (%) | PDB comment                                                          |
|---------------------------|------------------|-----------------|-------------|-------------------|-----------------------|----------------------------------------------------------------------|
| eIF2 $\alpha$<br>1-304    | SWISS-MODEL      | 7-267           | 0.55        | 3CW2C             | 19.6                  | aIF2 $\alpha$ , <i>Sulfolobus solfataricus</i>                       |
| eIF2 $\beta$<br>1-285     | SWISS-MODEL      | 127-261         | 0.27        | 3CW2K             | 30.4                  | aIF2 $\beta$ , <i>Sulfolobus solfataricus</i>                        |
| eIF2 $\gamma$<br>1-527    | MODELLER         | 96-519          | 1.0         | 1KK1A             | 48                    | eIF2 $\gamma$ , <i>Pyrococcus abyssi</i>                             |
| eIF2B $\alpha$<br>1-305   | SWISS-MODEL      | 1-304           | 1.0         | 3ECSA             | 44                    | Human eIF2B $\alpha$                                                 |
| eIF2B $\beta$<br>1-381    | SWISS-MODEL      | 60-371          | 1.0         | 3ECSA             | 23                    | Human eIF2B $\alpha$                                                 |
| eIF2B $\delta$<br>1-651   | MODELLER         | 245-536         | 1.0         | 2YVKA             | 18                    | 5-methylthioribose 1-phosphate isomerase, <i>Bacillus subtilis</i>   |
| eIF2B $\delta$<br>1-244   | MODELLER         | 36-105          | 0.03        | 1YA9A             | 13                    | Mouse apolipoprotein E                                               |
| eIF2B $\delta$<br>538-651 | MODELLER         | 540-651         | 0.21        | 3A11A             | 21                    | Ribose-1,5-bisphosphate isomerase, <i>Thermococcus kodakaraensis</i> |
| eIF2B $\gamma$            | SWISS-MODEL      | 44-314          | 0.33        | 1YP2A             | 10.1                  | Potato tuber ADP-glucose pyrophosphorylase                           |
| eIF2B $\gamma$            |                  | 375-565         | 0.3         | 2OI7A             | 10.4                  | GlmU acetyltransferase, <i>E. coli</i>                               |
| eIF2B $\epsilon$<br>1-520 | SWISS-MODEL      | 30-431          | 0.27        | 1YP2A             | 14.9                  | Potato tuber ADP-glucose pyrophosphorylase                           |
